# Supplementary material for: Clinical effectiveness of drugs in hospitalized patients with COVID-19: a systematic review and meta-analysis
Source: PubMed Central journal article supplement (PMC8010807; doi:10.1177/17534666211007214), 2021-03-25
Supplement: sj-pdf-4-tar-10.1177_17534666211007214.pdf [file sj-pdf-4-tar-10.1177_17534666211007214.pdf]

Supplemental file

Table 1. Search strategies

|    |                                     |
|----|-------------------------------------|
| 1  | COVID-19                            |
| 2  | SARS-CoV-2                          |
| 3  | 1 OR 2                              |
| 4  | hospitalized                        |
| 5  | admitted                            |
| 6  | 4 OR 5                              |
| 7  | Remdesivir                          |
| 8  | Chloroquine                         |
| 9  | Hydroxychloroquine                  |
| 10 | Lopinavir                           |
| 11 | Ritonavir                           |
| 12 | Plasma                              |
| 13 | Dexamethasone                       |
| 14 | 7 OR 8 OR 9 OR 10 OR 11 OR 12 OR 13 |
| 15 | 3 AND 6 AND 14                      |

Table 2. Risk of bias assessment

| N | Study ID   | Experimental                             | Comparator             | Outcome           | Randomization process | Deviations from intended interventions | Missing outcome data | Measurement of the outcome | Selection of the reported result | Overall |
|---|------------|------------------------------------------|------------------------|-------------------|-----------------------|----------------------------------------|----------------------|----------------------------|----------------------------------|---------|
| 1 | Cao 2020   | Lopinavir-Ritonavir                      | Standard care          | Early mortality   | +                     | ?                                      | +                    | -                          | +                                | -       |
| 2 | Wang 2020  | Remdesivir                               | Placebo                | Early mortality   | +                     | +                                      | +                    | +                          | +                                | +       |
| 3 | Cao 2020   | Lopinavir-Ritonavir                      | Standard care          | Late mortality    | +                     | ?                                      | +                    | -                          | +                                | -       |
| 4 | Wang 2020  | Remdesivir                               | Placebo                | Late mortality    | +                     | +                                      | +                    | +                          | +                                | +       |
| 5 | Cao 2020   | Lopinavir-Ritonavir                      | Standard care          | 28 days mortality | +                     | ?                                      | +                    | -                          | +                                | -       |
| 6 | Hung 2020  | Lopinavir-Ritonavir-Rivabirin-Interferon | Lopinavir-Ritonavir    | 30 days mortality | ?                     | ?                                      | +                    | +                          | +                                | !       |
| 7 | Wang 2020  | Remdesivir                               | Placebo                | 28 days mortality | +                     | +                                      | +                    | +                          | +                                | +       |
| 8 | Borba 2020 | Chloroquine high dosage                  | Chloroquine low dosage | 28 days mortality | +                     | +                                      | +                    | +                          | +                                | +       |

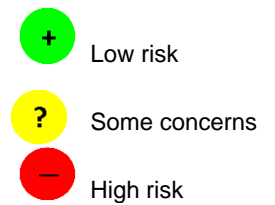

|    |               |                                          |                     |                              |  |  |  |  |  |  |
|----|---------------|------------------------------------------|---------------------|------------------------------|--|--|--|--|--|--|
| 9  | Horby 2020    | Dexamethasone                            | Standard care       | 28 days mortality            |  |  |  |  |  |  |
| 10 | Li 2020       | Convalescent plasma                      | Standard care       | 28 days mortality            |  |  |  |  |  |  |
| 11 | Tomazini 2020 | Dexamethasone                            | Standard care       | 28 days mortality            |  |  |  |  |  |  |
| 12 | Cao 2020      | Lopinavir-Ritonavir                      | Standard care       | Clinical improvement 7 days  |  |  |  |  |  |  |
| 13 | Hung 2020     | Lopinavir-Ritonavir-Rivabirin-Interferon | Lopinavir-Ritonavir | Clinical improvement 7 days  |  |  |  |  |  |  |
| 14 | Wang 2020     | Remdesivir                               | Placebo             | Clinical improvement 7 days  |  |  |  |  |  |  |
| 15 | Li 2020       | Convalescent plasma                      | Standard care       | Clinical improvement 7 days  |  |  |  |  |  |  |
| 16 | Spinner 2020  | Remdesivir                               | Standard care       | Clinical improvement 7 days  |  |  |  |  |  |  |
| 17 | Cao 2020      | Lopinavir-Ritonavir                      | Standard care       | Clinical improvement 14 days |  |  |  |  |  |  |
| 18 | Wang 2020     | Remdesivir                               | Placebo             | Clinical improvement 14 days |  |  |  |  |  |  |
| 19 | Li 2020       | Convalescent plasma                      | Standard care       | Clinical improvement 14 days |  |  |  |  |  |  |
| 20 | Spinner 2020  | Remdesivir                               | Standard care       | Clinical improvement 14 days |  |  |  |  |  |  |
| 21 | Cao 2020      | Lopinavir-Ritonavir                      | Standard care       | Clinical improvement 28 days |  |  |  |  |  |  |
| 22 | Wang 2020     | Remdesivir                               | Placebo             | Clinical improvement 28 days |  |  |  |  |  |  |
| 23 | Li 2020       | Convalescent plasma                      | Standard care       | Clinical improvement 28 days |  |  |  |  |  |  |
| 24 | Spinner 2020  | Remdesivir                               | Standard care       | Clinical improvement 28 days |  |  |  |  |  |  |
| 25 | Cao 2020      | Lopinavir-Ritonavir                      | Standard care       | Duration of ventilation      |  |  |  |  |  |  |

|    |              |                                          |                     |                            |   |   |   |   |   |   |
|----|--------------|------------------------------------------|---------------------|----------------------------|---|---|---|---|---|---|
| 26 | Wang 2020    | Remdesivir                               | Placebo             | Duration of ventilation    | + | + | + | + | + | + |
| 27 | Cao 2020     | Lopinavir-Ritonavir                      | Standard care       | Duration of oxygen support | + | ? | + | - | + | - |
| 28 | Wang 2020    | Remdesivir                               | Placebo             | Duration of oxygen support | + | + | + | + | + | + |
| 29 | Cao 2020     | Lopinavir-Ritonavir                      | Standard care       | Hospital stay              | + | ? | + | - | + | - |
| 30 | Hung 2020    | Lopinavir-Ritonavir-Rivabirin-Interferon | Lopinavir-Ritonavir | Hospital stay              | ? | ? | + | + | + | ! |
| 31 | Wang 2020    | Remdesivir                               | Placebo             | Hospital stay              | + | + | + | + | + | + |
| 32 | Cao 2020     | Lopinavir-Ritonavir                      | Standard care       | Virus clearance            | + | ? | - | - | + | - |
| 33 | Hung 2020    | Lopinavir-Ritonavir-Rivabirin-Interferon | Lopinavir-Ritonavir | Virus clearance            | ? | ? | - | + | + | - |
| 34 | Wang 2020    | Remdesivir                               | Placebo             | Virus clearance            | + | + | - | + | + | - |
| 35 | Chen 2020    | Hydroxychloroquine                       | Standard care       | Virus clearance            | ? | ? | + | + | + | ! |
| 36 | Gautret 2020 | Hydroxychloroquine                       | Standard care       | Virus clearance            | - | - | + | + | + | - |
| 37 | Tang 2020    | Hydroxychloroquine                       | Standard care       | Virus clearance            | - | ? | + | + | + | - |
| 38 | Li 2020      | Convalescent plasma                      | Standard care       | Virus clearance            | - | - | + | + | + | - |
| 39 | Cao 2020     | Lopinavir-Ritonavir                      | Standard care       | Severe adverse events      | + | ? | + | + | + | ! |
| 40 | Hung 2020    | Lopinavir-Ritonavir-Rivabirin-Interferon | Lopinavir-Ritonavir | Severe adverse events      | ? | ? | + | + | + | ! |
| 41 | Wang 2020    | Remdesivir                               | Placebo             | Severe adverse events      | + | + | + | + | + | + |
| 42 | Chen 2020    | Hydroxychloroquine                       | Standard care       | Severe adverse events      | ? | ? | + | + | + | ! |

|    |               |                         |                        |                       |                                                                                     |                                                                                     |                                                                                     |                                                                                     |                                                                                     |                                                                                     |
|----|---------------|-------------------------|------------------------|-----------------------|-------------------------------------------------------------------------------------|-------------------------------------------------------------------------------------|-------------------------------------------------------------------------------------|-------------------------------------------------------------------------------------|-------------------------------------------------------------------------------------|-------------------------------------------------------------------------------------|
| 43 | Tang 2020     | Hydroxychloroquine      | Standard care          | Severe adverse events |  |  |  |  |  |  |
| 44 | Borba 2020    | Chloroquine high dosage | Chloroquine low dosage | Severe adverse events |  |  |  |  |  |  |
| 45 | Spinner 2020  | Remdesivir              | Standard care          | Severe adverse events |  |  |  |  |  |  |
| 46 | Tomazini 2020 | Dexamethasone           | Standard care          | Severe adverse events |  |  |  |  |  |  |

Meta-analysis

Figure S.1. Forest plot of drugs employed in hospitalized patients with SARS-CoV-2 infection.

Comparison: Remdesivir versus Standard care or Placebo.

Outcome: Severe adverse events.

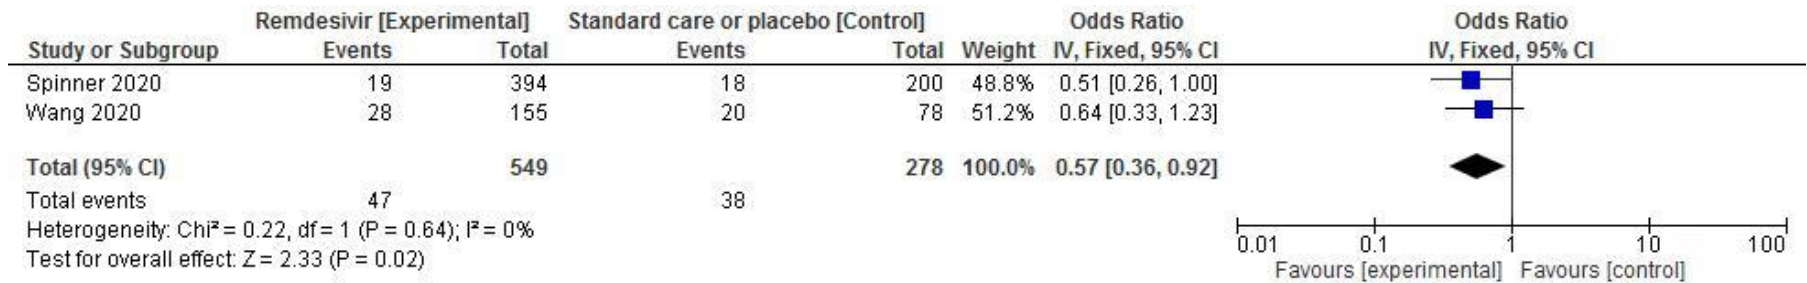

Figure S.2. Forest plot of drugs employed in hospitalized patients with SARS-CoV-2 infection.

Comparison: Hydroxychloroquine versus Standard care.

Outcome: Virological clearance at day 7.

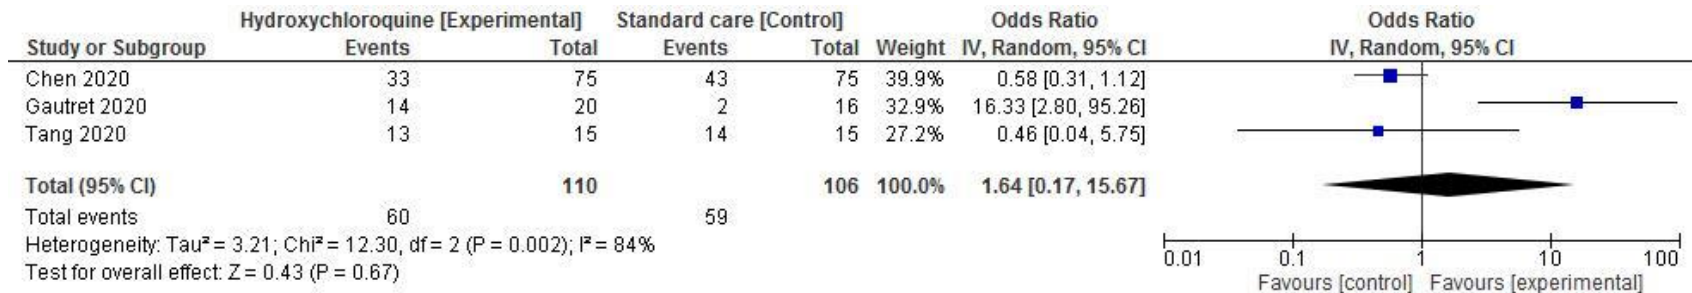

Figure S.3. Forest plot of drugs employed in hospitalized patients with SARS-CoV-2 infection.

Comparison: Hydroxychloroquine versus Standard care.

Outcome: Severe adverse events.

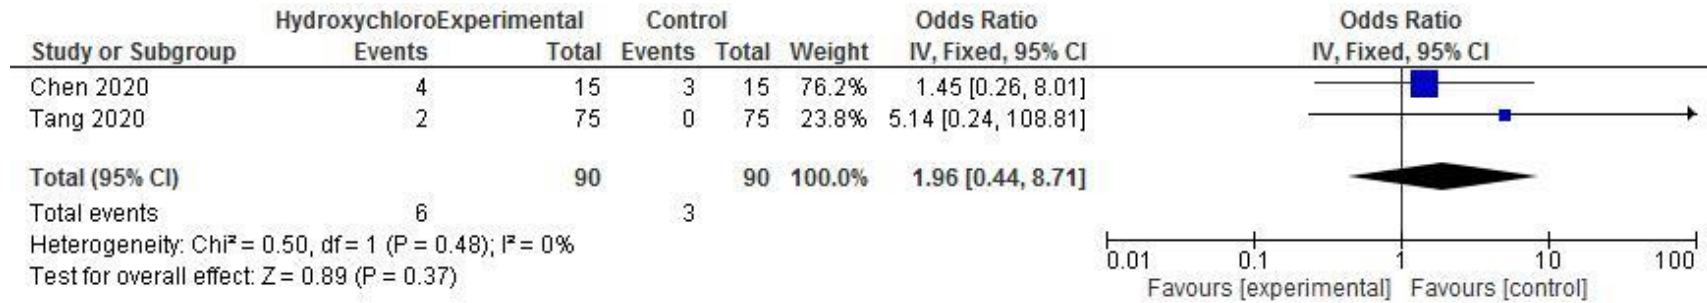

Table 3. Excluded studies with reasons

| Author              | Reference | Reason for excluding   |
|---------------------|-----------|------------------------|
| Lecronier 2020      | 1         | retrospective          |
| Saiz Rodriguez 2020 | 2         | protocol               |
| Duska 2020          | 3         | protocol               |
| Doggrell 2020       | 4         | expert opinion article |
| Bosch Barrera 2020  | 5         | monograph              |
| Liu 2020            | 6         | protocol               |
| Singh 2020          | 7         | monograph              |
| Maillart 2020       | 8         | case report            |
| Jean 2020           | 9         | monograph              |
| Abena 2020          | 10        | monograph              |
| Ahmad 2020          | 11        | monograph              |
| Plaze 2020          | 12        | monograph              |
| Wang 2020           | 13        | protocol               |
| Lother 2020         | 14        | protocol               |
| Thibodeaux 2020     | 15        | case report            |
| Shen 2020           | 16        | case report            |
| Martínez 2020       | 17        | monograph              |
| Kakodkar 2020       | 18        | review                 |
| Ye 2020             | 19        | retrospective          |
| Lai 2020            | 20        | monograph              |
| Gao 2020            | 21        | letter                 |
| Şimşek Yavuz 2020   | 22        | review                 |
| Monteiro 2020       | 23        | letter                 |
| Yousefifard 2020    | 24        | review                 |
| Viveiros Rosa 2020  | 25        | review                 |
| González 2020       | 26        | protocol               |
| Sivapalam 2020      | 27        | protocol               |

#### References of excluded articles

1. Lecronier M, Beurton A, Burrell S, et al. Comparison of hydroxychloroquine, lopinavir/ritonavir, and standard of care in critically ill patients with SARS-CoV-2 pneumonia: an opportunistic retrospective analysis. *Crit Care* 2020; 24: 418.
2. Saiz-Rodríguez M, Peña T, Lázaro L, et al. Outpatient treatment of COVID-



19 with steroids in the phase of mild pneumonia without the need for admission as an opportunity to modify the course of the disease: A structured summary of a randomised controlled trial. *Trials* 2020; 21: 632.

3. Duška F, Waldauf P, Halačová M, et al. Azithromycin added to hydroxychloroquine for patients admitted to intensive care due to coronavirus disease 2019 (COVID-19)—protocol of randomised controlled trial AZIQUINE-ICU. *Trials* 2020; 21: 631.
4. Doggrell SA. Does lopinavir measure up in the treatment of COVID-19? *Expert Opin Investig Drugs* 2020; 1–4.
5. Bosch-Barrera J, Martin-Castillo B, Buxó M, et al. Silibinin and SARS-CoV-2: Dual Targeting of Host Cytokine Storm and Virus Replication Machinery for Clinical Management of COVID-19 Patients. *J Clin Med* 2020; 9: 1770.
6. Liu X, Chen H, Shang Y, et al. Efficacy of chloroquine versus lopinavir/ritonavir in mild/general COVID-19 infection: a prospective, open-label, multicenter, randomized controlled clinical study. *Trials* 2020; 21: 622.
7. Singh AK, Singh A, Shaikh A, et al. Chloroquine and hydroxychloroquine in the treatment of COVID-19 with or without diabetes: A systematic search and a narrative review with a special reference to India and other developing countries. *Diabetes Metab Syndr Clin Res Rev* 2020; 14: 241–246.
8. Maillart E, Leemans S, Van Noten H, et al. A case report of serious haemolysis in a glucose-6-phosphate dehydrogenase-deficient COVID-19 patient receiving hydroxychloroquine. *Infect Dis (Auckl)* 2020; 52: 659–661.
9. Jean S-S, Hsueh P-R. Old and re-purposed drugs for the treatment of COVID-19. *Expert Rev Anti Infect Ther* 2020; 1–5.
10. Abena PM, Decloedt EH, Bottieau E, et al. Chloroquine and Hydroxychloroquine for the Prevention or Treatment of COVID-19 in Africa: Caution for Inappropriate Off-label Use in Healthcare Settings. *Am J Trop Med Hyg* 2020; 102: 1184–1188.
11. Ahmad M., Dasgupta A, Chopra S. Remdesivir. RNA-dependent RNA polymerase inhibitor, Treatment of Ebola virus infection, Treatment of SARS-CoV-2 infection (COVID-19). *Drugs Future* 2020; 45: 369.
12. Plaze M, Attali D, Petit A-C, et al. Repositionnement de la chlorpromazine dans le traitement du COVID-19 : étude reCoVery. *Encephale* 2020; 46: S35–S39.
13. Wang Y, Zhou F, Zhang D, et al. Evaluation of the efficacy and safety of intravenous remdesivir in adult patients with severe COVID-19: study protocol for a phase 3 randomized, double-blind, placebo-controlled, multicentre trial. *Trials* 2020; 21: 422.

14. Lothar SA, Abassi M, Agostinis A, et al. Post-exposure prophylaxis or pre-emptive therapy for severe acute respiratory syndrome coronavirus 2 (SARS-CoV-2): study protocol for a pragmatic randomized-controlled trial. *Can J Anesth Can d'anesthésie* 2020; 67: 1201–1211.
15. Thibodeaux K, Speyrer M, Raza A, et al. Hyperbaric oxygen therapy in preventing mechanical ventilation in COVID-19 patients: a retrospective case series. *J Wound Care* 2020; 29: S4–S8.
16. Shen C, Wang Z, Zhao F, et al. Treatment of 5 Critically Ill Patients With COVID-19 With Convalescent Plasma. *JAMA* 2020; 323: 1582.
17. Martinez MA. Compounds with Therapeutic Potential against Novel Respiratory 2019 Coronavirus. *Antimicrob Agents Chemother*, 64. Epub ahead of print 9 March 2020. DOI: 10.1128/AAC.00399-20.
18. Kakodkar P, Kaka N, Baig M. A Comprehensive Literature Review on the Clinical Presentation, and Management of the Pandemic Coronavirus Disease 2019 (COVID-19). *Cureus*. Epub ahead of print 6 April 2020. DOI: 10.7759/cureus.7560.
19. Ye XT, Luo YL, Xia SC, et al. Clinical efficacy of lopinavir/ritonavir in the treatment of Coronavirus disease 2019. *Eur Rev Med Pharmacol Sci* 2020; 24: 3390–3396.
20. Lai C-C, Shih T-P, Ko W-C, et al. Severe acute respiratory syndrome coronavirus 2 (SARS-CoV-2) and coronavirus disease-2019 (COVID-19): The epidemic and the challenges. *Int J Antimicrob Agents* 2020; 55: 105924.
21. Gao J, Tian Z, Yang X. Breakthrough: Chloroquine phosphate has shown apparent efficacy in treatment of COVID-19 associated pneumonia in clinical studies. *Biosci Trends* 2020; 14: 72–73.
22. ŞİMŞEK YAVUZ S, ÜNAL S. Antiviral treatment of COVID-19. *TURKISH J Med Sci* 2020; 50: 611–619.
23. Monteiro WM, Brito-Sousa JD, Baía-da-Silva D, et al. Driving forces for COVID-19 clinical trials using chloroquine: the need to choose the right research questions and outcomes. *Rev Soc Bras Med Trop*; 53. Epub ahead of print 2020. DOI: 10.1590/0037-8682-0155-2020.
24. Yousefifard M, Zali A, Mohamed Ali K, et al. Antiviral therapy in management of COVID-19: a systematic review on current evidence. *Arch Acad Emerg Med* 2020; 8: e45.
25. Rosa SGV, Santos WC. Clinical trials on drug repositioning for COVID-19 treatment. *Rev Panam Salud Pública* 2020; 44: 1.
26. González R, García-Otero L, Pons-Duran C, et al. Hydroxychloroquine efficacy and safety in preventing SARS-CoV-2 infection and COVID-19

disease severity during pregnancy (COVID-Preg): a structured summary of a study protocol for a randomised placebo controlled trial. *Trials* 2020; 21: 607.

27. Sivapalan P, Ulrik CS, Bojesen RD, et al. Proactive Prophylaxis With Azithromycin and HydroxyChloroquine in Hospitalised Patients With COVID-19 (ProPAC-COVID): A structured summary of a study protocol for a randomised controlled trial. *Trials* 2020; 21: 513.
